# Supplementary figures and images for: Copper Nanoparticles Show Obvious in vitro and in vivo Reproductive Toxicity via ERK Mediated Signaling Pathway in Female Mice
Source: PubMed Central journal article supplement — Int J Biol Sci. 2018 Oct 20;14(13):1834–44. doi: 10.7150/ijbs.27640 (PMC6231217; doi:10.7150/ijbs.27640), 2018-10-20

Supplementary Figure 1

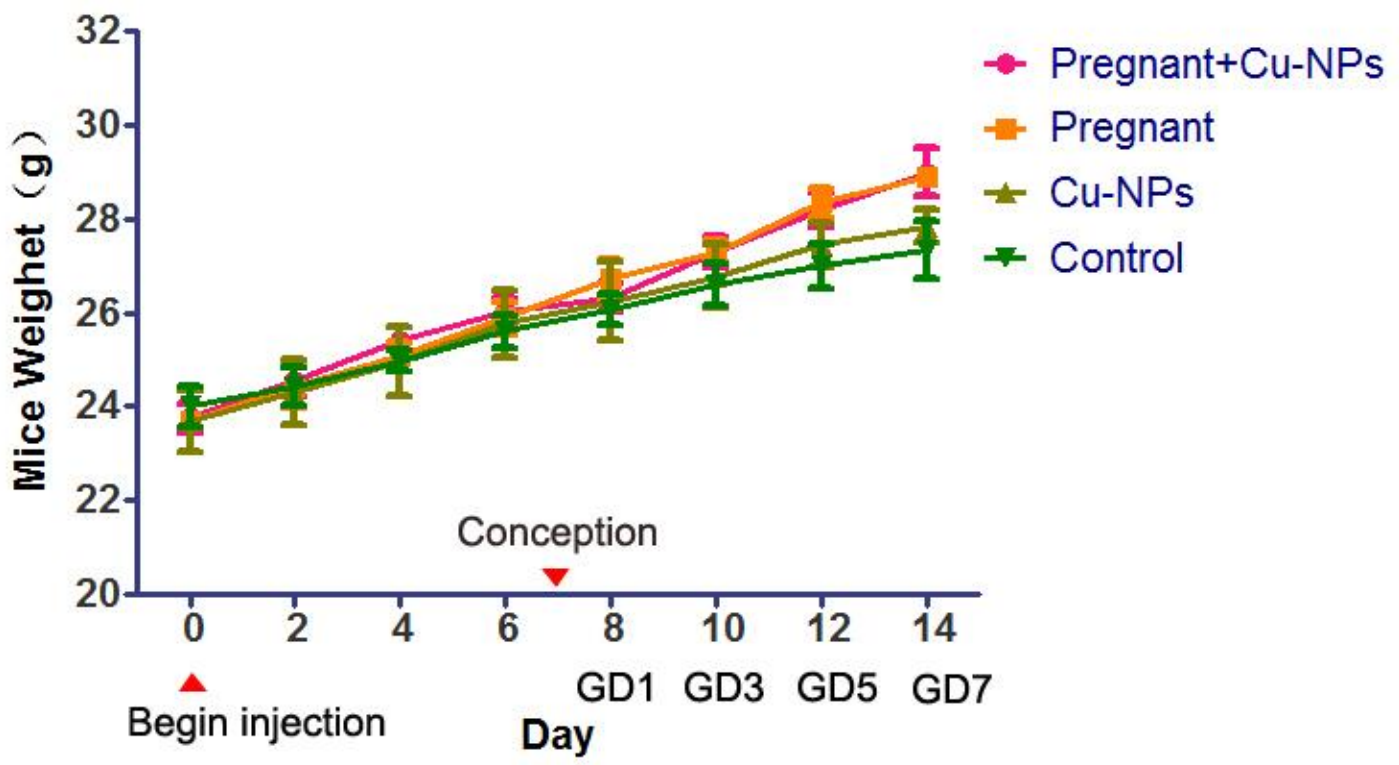

Supplement: ijbsv14p1834s1.pdf [file ijbsv14p1834s1.pdf]
